# Supplementary figures and images for: Comparative Transcriptome Analysis Provides Novel Molecular Events for the Differentiation and Maturation of Hepatocytes during the Liver Development of Zebrafish
Source: MDPI journal article supplement (doi:10.3390/biomedicines10092264), 2022-09-13

Figure S1

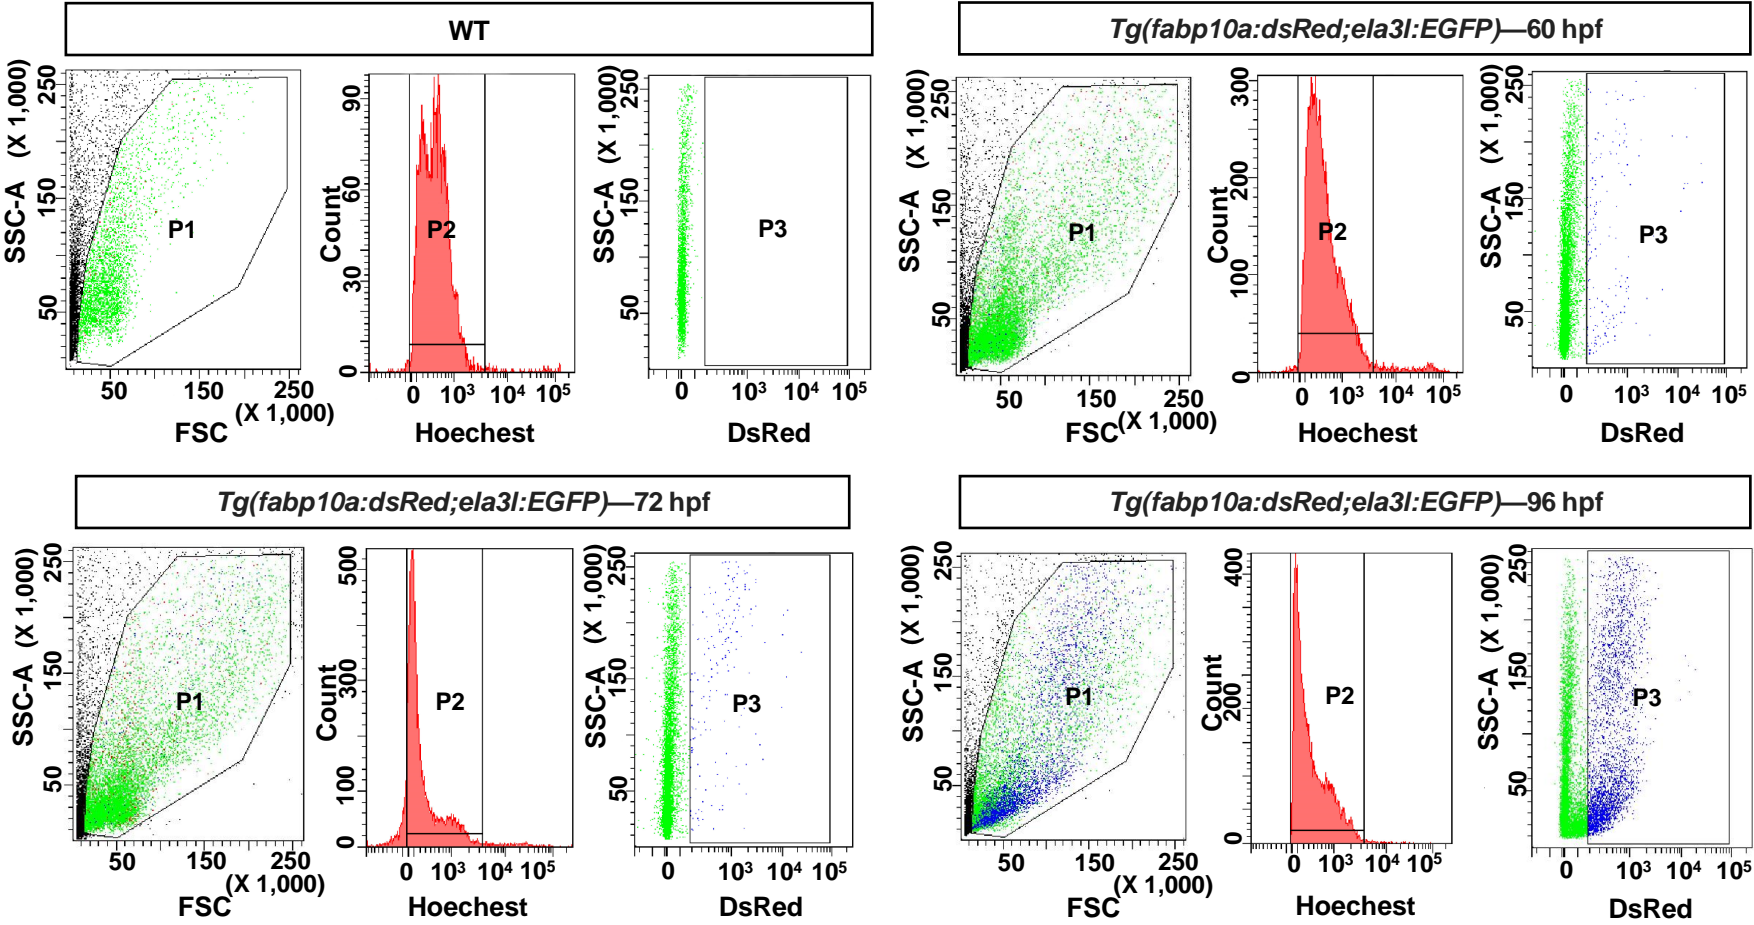

Figure S2

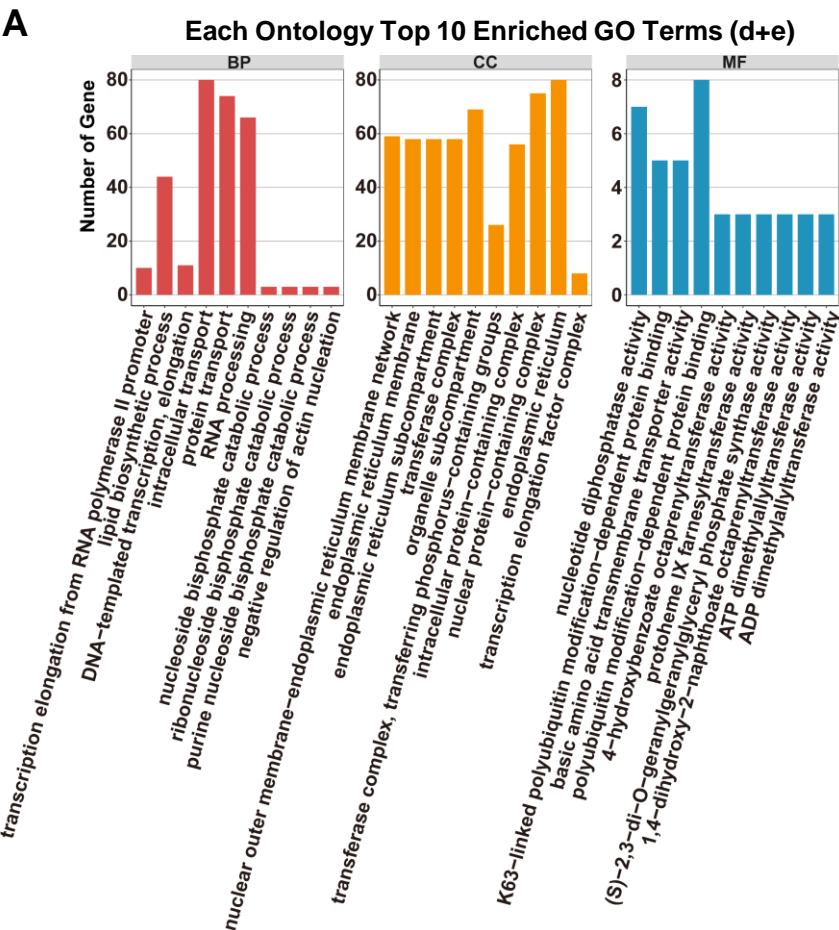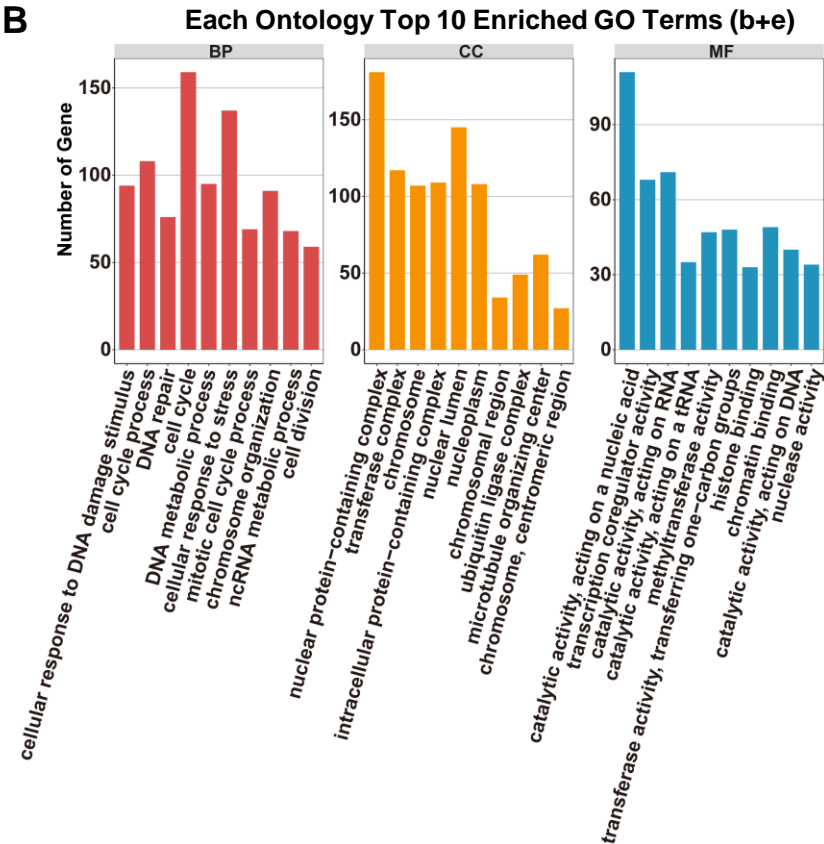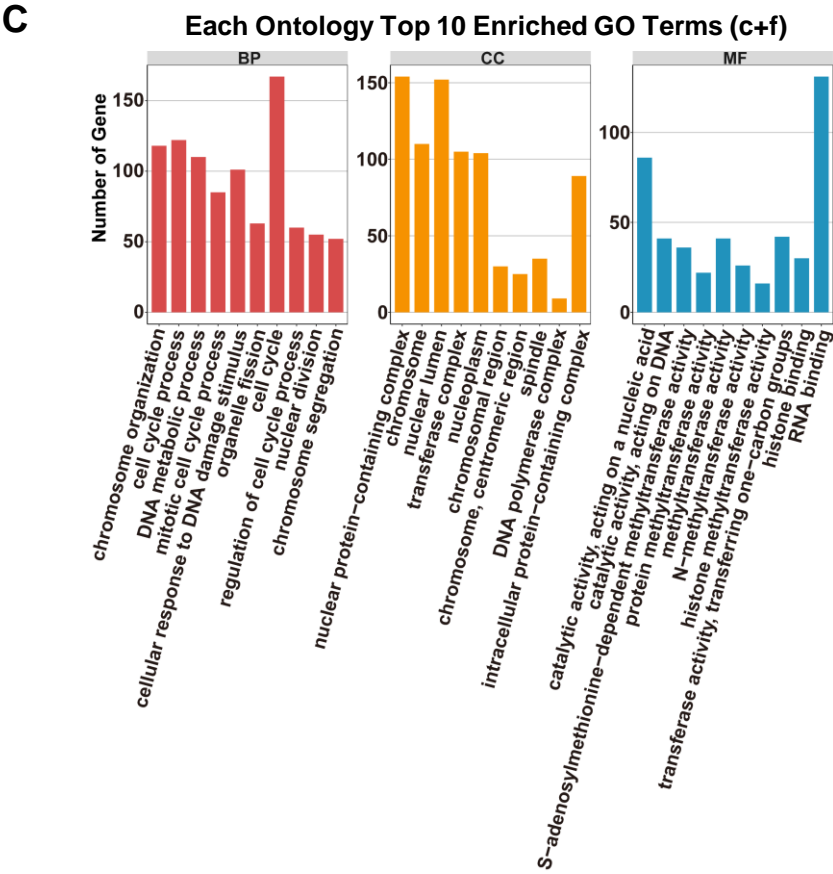

Figure S3

A

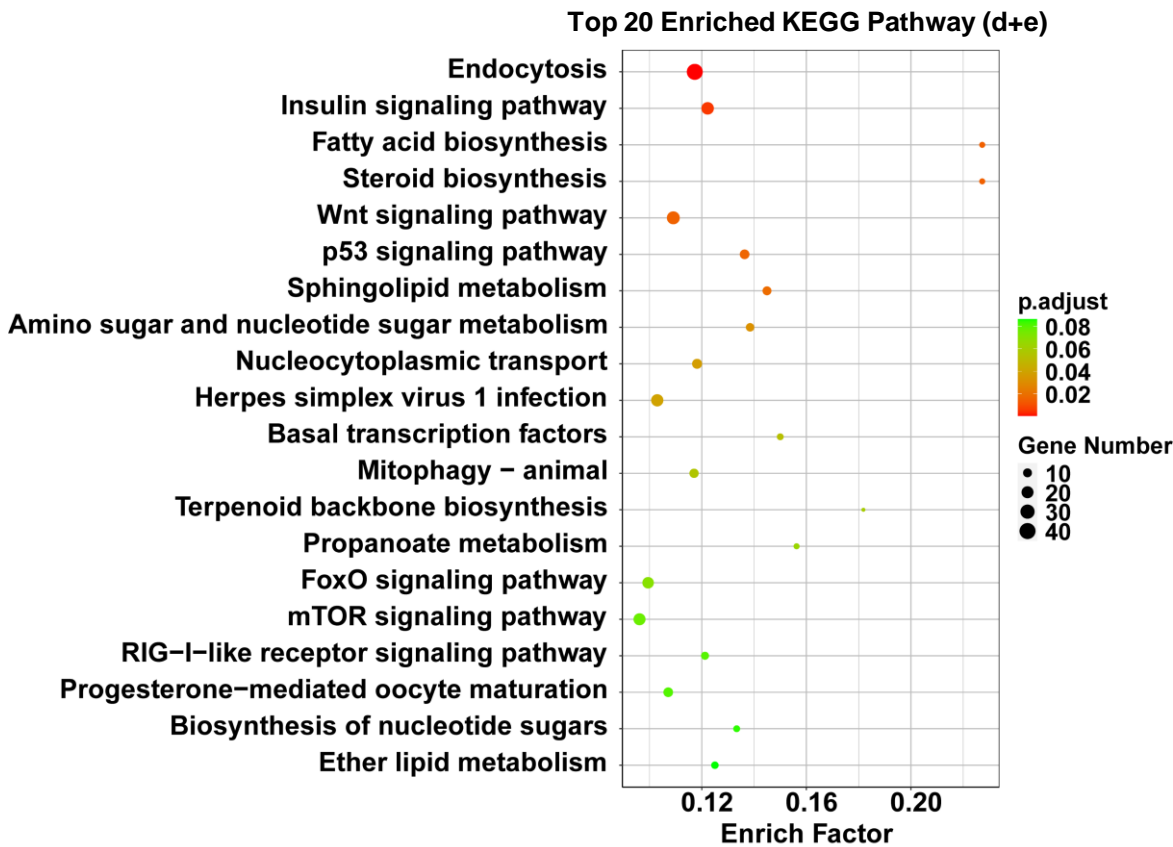

B

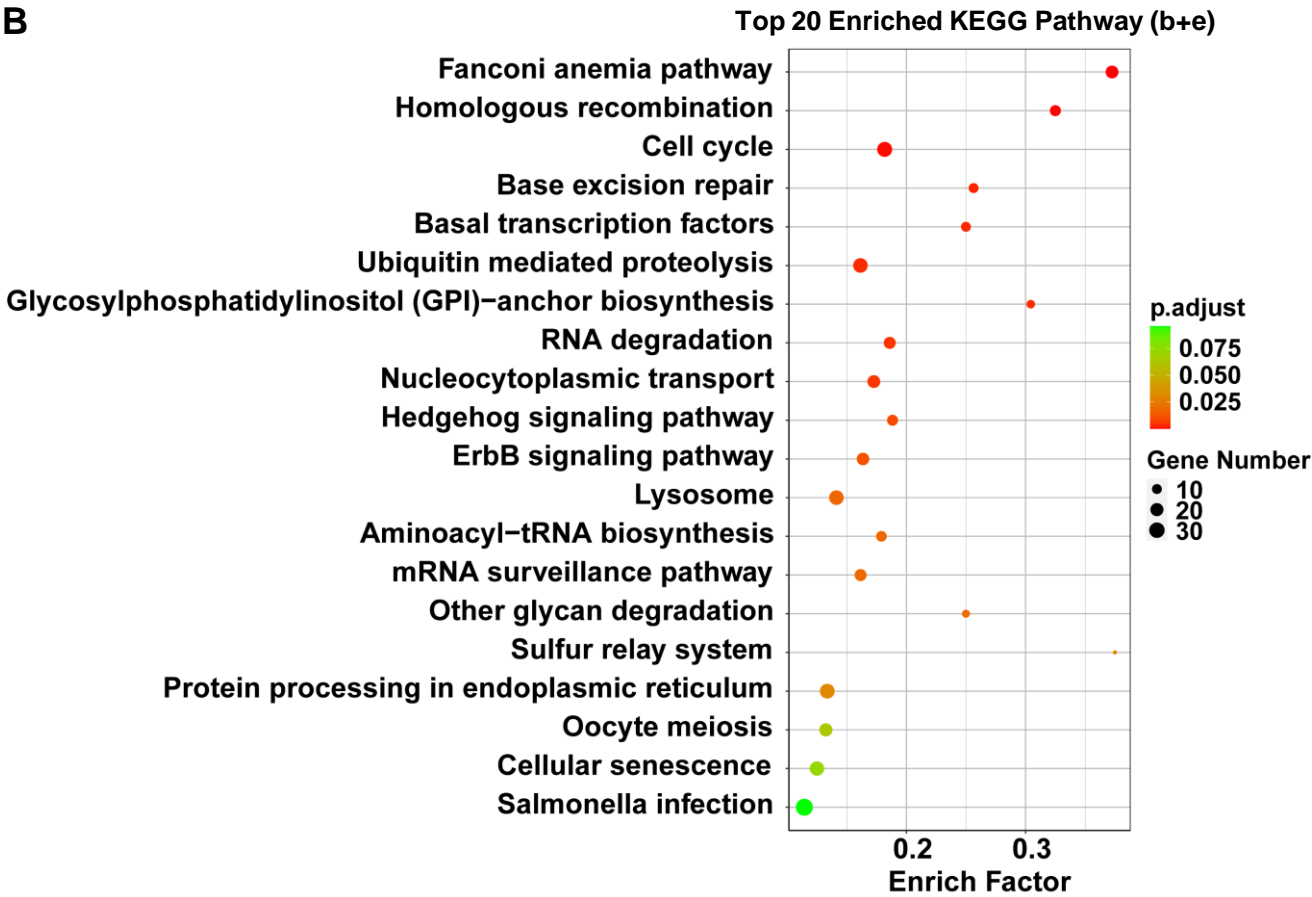

C

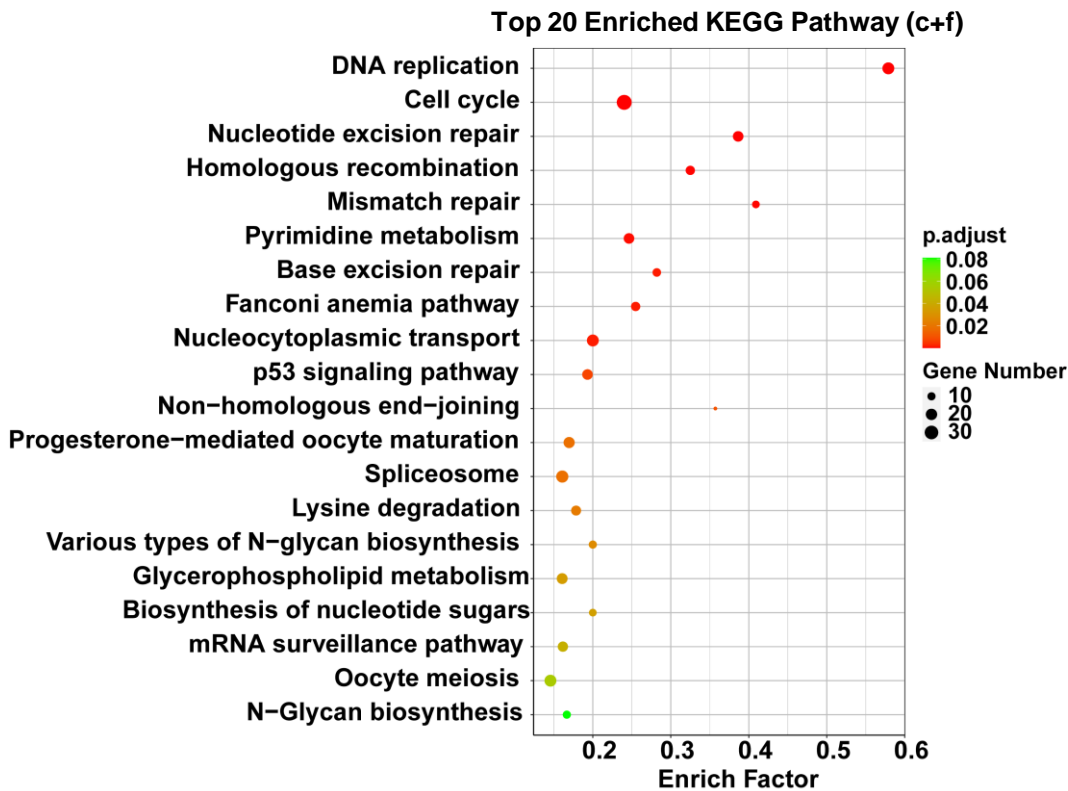

Supplement: s1 [file s1]
